# Supplementary material for: In the Search of Marine Pestiviruses: First Case of Phocoena Pestivirus in a Belt Sea Harbour Porpoise
Source: MDPI journal article supplement (doi:10.3390/v14010161), 2022-01-17
Supplement: s1 [file s1]

## Supplementary Figure S1

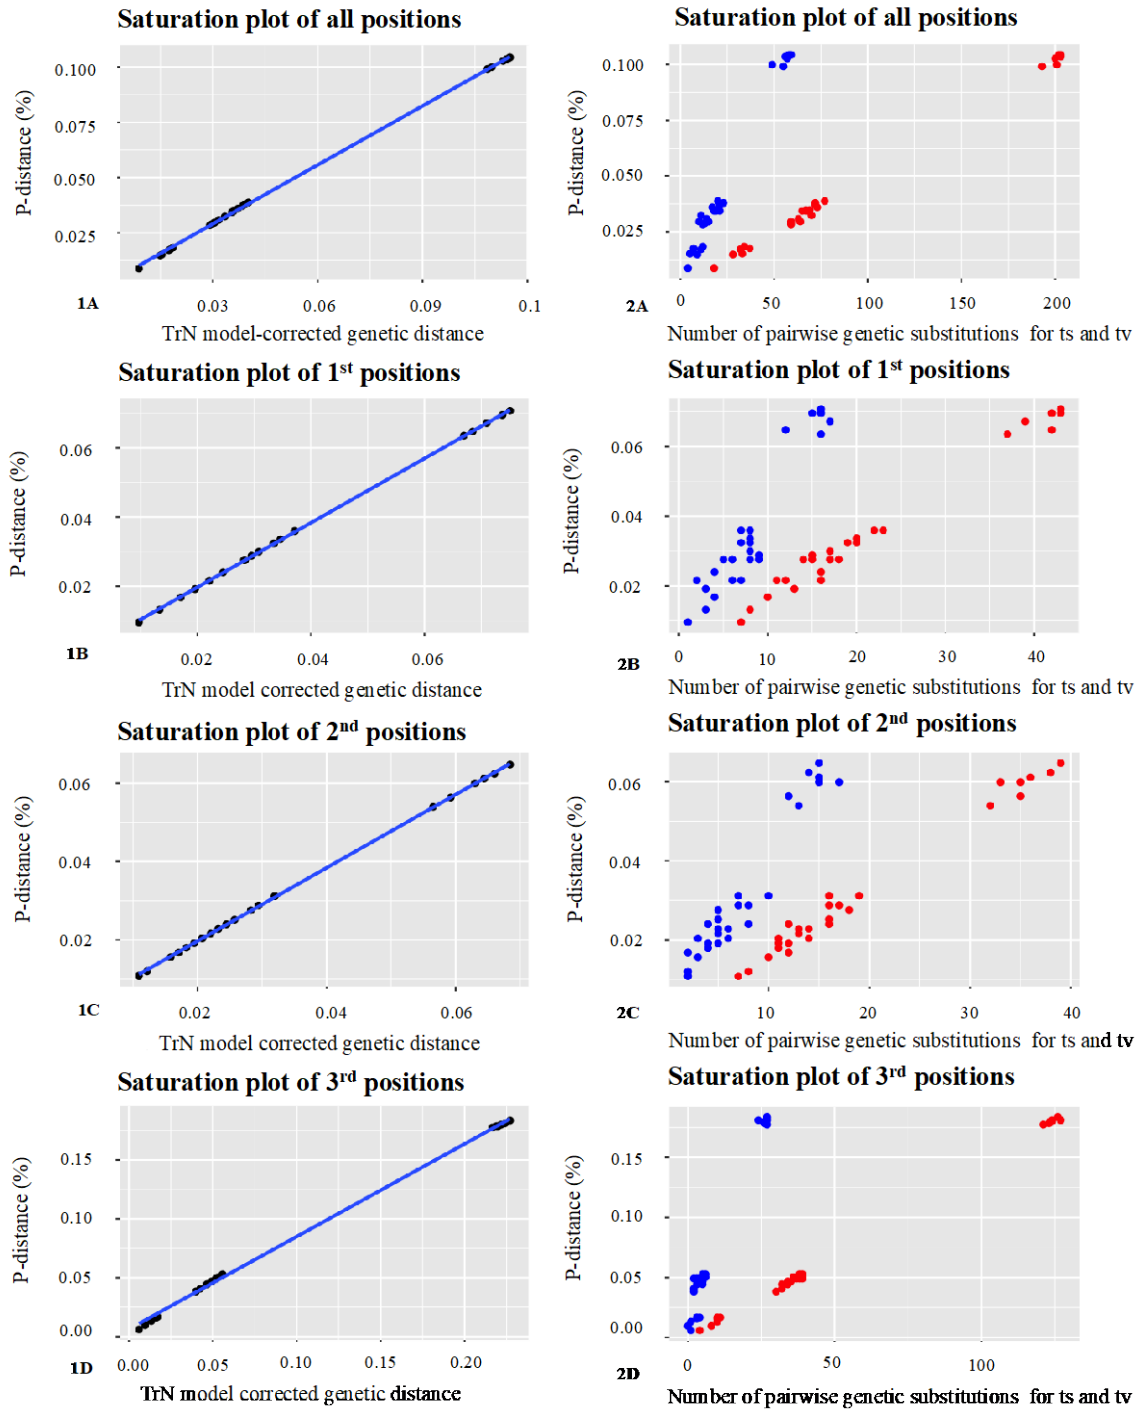

**Supplementary Figure S1.** Two different substitution saturation plots for the PhoPeV alignment covering all positions, 1<sup>st</sup>, 2<sup>nd</sup> and 3<sup>rd</sup> positions. 1) Plots of uncorrelated pairwise distances vs TrN model-corrected genetic distances (Philippe *et al.*, 1994), where a curved line indicates substitution saturation and a linear line indicates no substitution saturation. 2) Plots of transitions (ts = red) and transversions (tv = blue) (Lydeard and Roe, 1997; Knudsen, et al., 2019), where evidence of

substitution saturation has been found if the red and blue lines cross. In this case no evidence of substitution saturation was detected in either of the plots.

## Supplementary Figure S2

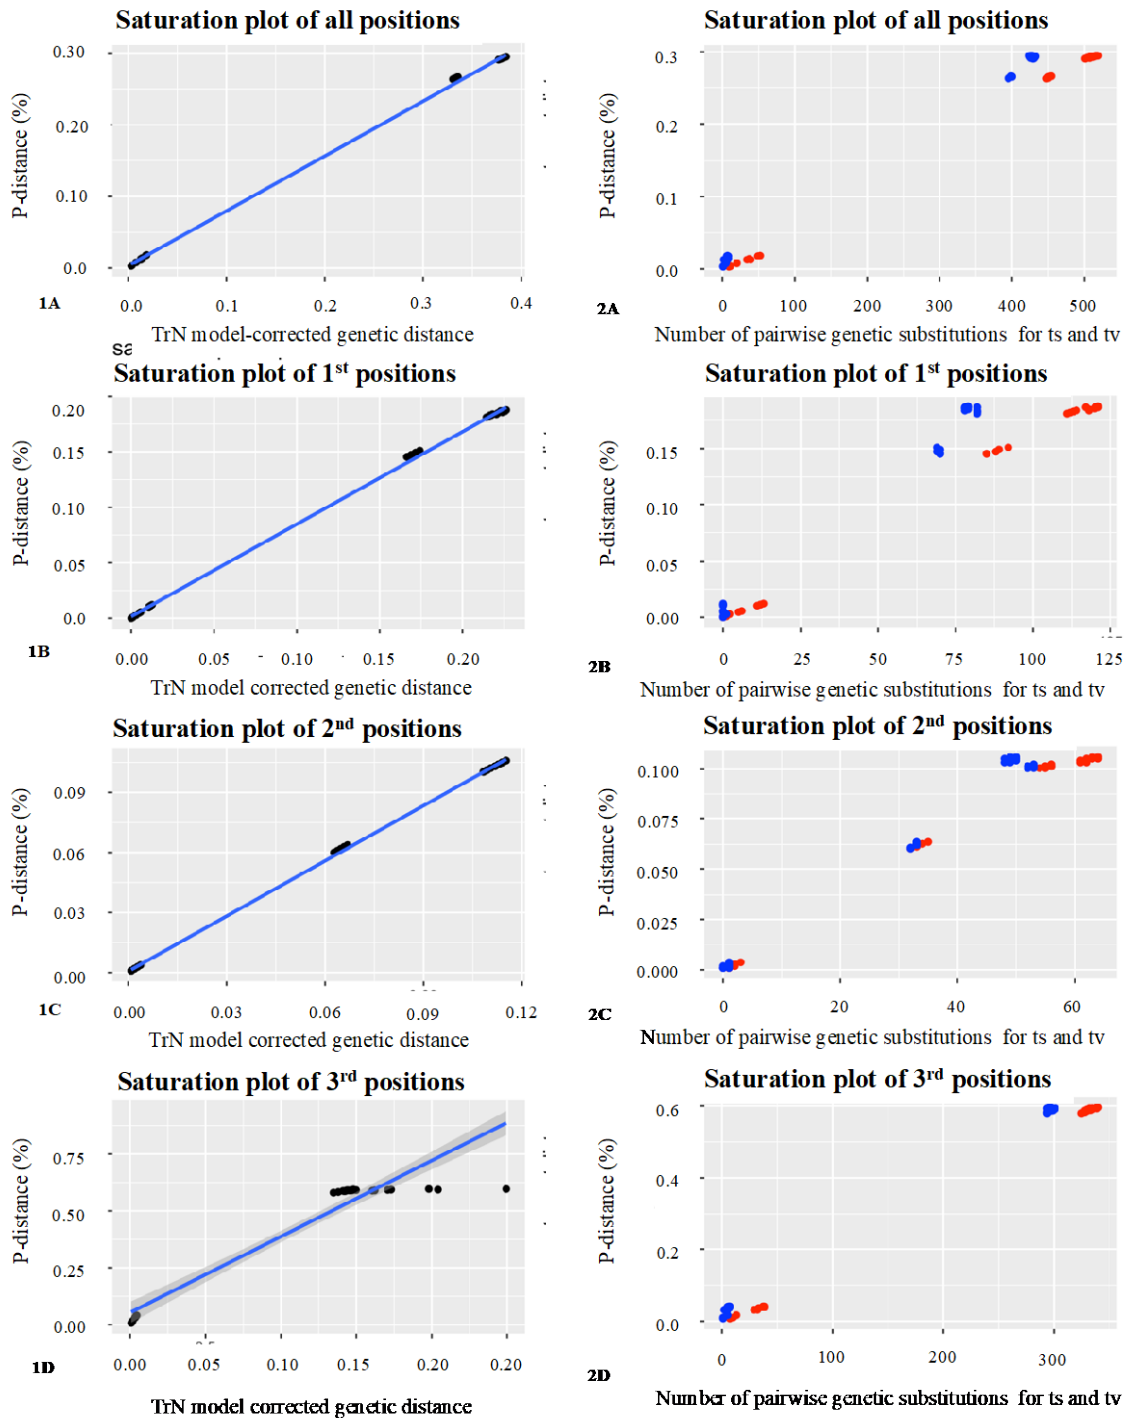

**Supplementary Figure S2.** Two different substitution saturation plots for the PhoPeV, BuPV, LindaV alignment covering the 1<sup>st</sup>, 2<sup>nd</sup> and 3<sup>rd</sup> positions of conserved region 2 and 3. 1) Plots of uncorrelated pairwise distances vs TrN model-corrected genetic distances (Philippe *et al.*, 1994), where a curved line indicates substitution saturation and a linear line indicates no substitution saturation. 2) Plots of transitions (ts = red) and transversions (tv = blue) (Lydeard and Roe, 1997;

Knudsen, et al., 2019), where evidence of substitution saturation has been found if the red and blue lines cross. In this case evidence of substitution saturation was detected on the 3<sup>rd</sup> codon position.

**Supplementary Table S1.** A complete list of the harbour porpoises, harbour seals, grey seals and ringed seals screened throughout this study. Additional sample information such as collection date, sex, age, collection site and sample type are listed when possible. (-) indicates that there is no information. The sample type is indicated by IL = Individual lung tissue extraction, PL = Pooled lung tissue extractions from 3-5 individuals and PMO = Pooled mixed organ extractions from the same individual. \* = Samples which were screened separately possibly as pooled samples.

| Sample number | Species          | Collection date | Sex    | Age      | Country | Area             | Extraction |
|---------------|------------------|-----------------|--------|----------|---------|------------------|------------|
| 36267         | Harbour porpoise | 2007-04-10      | Male   | Immature | Denmark | Zealand          | PL         |
| 27238         | Harbour porpoise | 2007-05-22      | Male   | Adult    | Denmark | Kattegat         | IL         |
| 35091         | Harbour porpoise | 2010-01-05      | Male   | NA       | Denmark | Danish straits   | PL         |
| 35095         | Harbour porpoise | 2010-03-09      | Male   | Immature | Denmark | Kattegat         | IL         |
| 35096         | Harbour porpoise | 2010-03-15      | Female | NA       | Denmark | The Sound        | PL         |
| 35097         | Harbour porpoise | 2010-03-15      | Female | NA       | Denmark | The Sound        | PL         |
| 35098         | Harbour porpoise | 2010-04-07      | Male   | NA       | Denmark | Kattegat         | PL         |
| 43703         | Harbour porpoise | 2010-04-15      | Male   | NA       | Denmark | The Sound        | PL         |
| 35099         | Harbour porpoise | 2010-04-22      | Male   | NA       | Denmark | The Sound        | PL         |
| 35100         | Harbour porpoise | 2010-04-22      | Male   | NA       | Denmark | The Sound        | PL         |
| 43702         | Harbour porpoise | 2010-04-29      | Female | NA       | Denmark | The Sound        | PL         |
| 43705         | Harbour porpoise | 2010-05-02      | Male   | NA       | Denmark | Kattegat         | PL         |
| 43704         | Harbour porpoise | 2010-05-13      | Male   | NA       | Denmark | Danish straits   | PL         |
| 43706         | Harbour porpoise | 2010-05-28      | Male   | NA       | Denmark | Kattegat         | PL         |
| 43707         | Harbour porpoise | 2010-06-03      | Female | NA       | Denmark | Kattegat         | IL         |
| 43708         | Harbour porpoise | 2010-06-04      | Male   | Immature | Denmark | The Sound        | IL         |
| 43709         | Harbour porpoise | 2010-06-04      | Male   | Immature | Denmark | The Sound        | IL         |
| 43710         | Harbour porpoise | 2010-06-08      | Male   | Immature | Denmark | The Sound        | IL         |
| 43711         | Harbour porpoise | 2010-06-19      | Female | NA       | Denmark | Kattegat         | IL         |
| 43262         | Harbour porpoise | 2010-07-14      | Male   | NA       | Denmark | The Sound        | PL         |
| 43713         | Harbour porpoise | 2010-07-22      | Female | NA       | Denmark | The Sound        | IL         |
| 43721         | Harbour porpoise | 2010-08-05      | Female | NA       | Denmark | The Sound        | IL         |
| 43715         | Harbour porpoise | 2010-12-04      | Male   | NA       | Denmark | Skagerrak        | IL         |
| 43720         | Harbour porpoise | 2011-02-04      | Female | NA       | Denmark | Zealand          | IL         |
| 43722         | Harbour porpoise | 2011-07-02      | Female | Adult    | Denmark | Kattegat         | IL         |
| 43717         | Harbour porpoise | 2011-08-05      | Female | NA       | Denmark | Danish Straits   | IL         |
| 43726         | Harbour porpoise | 2012-07-02      | Female | NA       | Denmark | North Sea        | IL         |
| 50735         | Harbour porpoise | 2015-09-10      | Male   | NA       | Denmark | The Sound        | IL         |
| 60302         | Harbour porpoise | 2017-09-28      | Female | 0 years  | Denmark | Danish straits   | IL         |
| A2018/05383   | Harbour porpoise | 2017-11-20      | Male   | Adult    | Sweden  | The Sound        | IL         |
| A2018/05285   | Harbour porpoise | 2018-03-14      | Female | Subadult | Sweden  | The Sound        | IL         |
| 57027         | Harbour porpoise | 2018-04-05      | Male   | NA       | Denmark | Danish straits   | IL         |
| A2018/05286   | Harbour porpoise | 2018-04-08      | Male   | Subadult | Sweden  | The Sound        | IL         |
| 60303         | Harbour porpoise | 2018-04-19      | Male   | NA       | Denmark | Danish straits   | IL         |
| A2018/05284   | Harbour porpoise | 2018-12-18      | Male   | Adult    | Sweden  | Kattegat (Skåne) | IL         |
| 24484         | Harbour porpoise | 2019-09-21      | Male   | Juvenile | Germany | Danish Straits   | PMO        |
| 24476         | Harbour porpoise | 2019-10-21      | Male   | Juvenile | Germany | Danish Straits   | PMO        |
| 24477         | Harbour porpoise | 2019-11-05      | Female | Juvenile | Germany | Danish Straits   | PMO        |

| Sample number | Species          | Collection date | Sex    | Age      | Country | Area                 | Extraction |
|---------------|------------------|-----------------|--------|----------|---------|----------------------|------------|
| 23288         | Harbour porpoise | 2018-08-01      | Male   | NA       | Germany | Danish Straits       | IL         |
| 24263         | Harbour porpoise | 2018-09-01      | Female | Neonate  | Denmark | Danish Straits       | IL         |
| 23616         | Harbour porpoise | 2018-12-01      | Male   | NA       | Germany | Danish Straits       | IL         |
| 23817         | Harbour porpoise | 2019-02-25      | Female | NA       | Germany | Danish Straits       | IL         |
| 24247         | Harbour porpoise | 2019-03-06      | Male   | Adult    | Denmark | The Sound            | IL         |
| 24250         | Harbour porpoise | 2019-03-06      | Female | Neonate  | Denmark | Kattegat             | IL         |
| 23771         | Harbour porpoise | 2019-04-16      | Male   | NA       | Germany | North Sea            | IL         |
| 24256         | Harbour porpoise | 2019-05-23      | Male   | Juvenile | Denmark | Kattegat             | IL         |
| 24257         | Harbour porpoise | 2019-07-20      | Female | Juvenile | Denmark | Kattegat             | IL         |
| 24239         | Harbour porpoise | 2019-07-27      | Female | Neonate  | Denmark | Danish Straits       | IL         |
| 24023         | Harbour porpoise | 2019-08-08      | Male   | NA       | Germany | Danish Straits       | IL         |
| 24144         | Harbour porpoise | 2019-08-10      | Female | Adult    | Germany | Danish Straits       | IL         |
| 24474         | Harbour porpoise | 2019-08-11      | Female | Neonat   | Germany | Danish Straits       | PMO        |
| 24294         | Harbour porpoise | 2019-08-14      | Female | Juvenile | Germany | Danish Straits       | PMO        |
| 24245         | Harbour porpoise | 2019-08-22      | Male   | Neonate  | Denmark | Danish Straits       | IL         |
| 24084         | Harbour porpoise | 2019-08-24      | Male   | NA       | Germany | Danish Straits       | IL         |
| 24251         | Harbour porpoise | 2019-09-05      | Male   | Adult    | Denmark | Bornholm Basin       | IL         |
| 24468         | Harbour porpoise | 2019-09-07      | Female | Juvenile | Germany | Danish Straits       | PMO        |
| 24138         | Harbour porpoise | 2019-09-10      | Female | NA       | Germany | Danish Straits       | IL         |
| 24146         | Harbour porpoise | 2019-09-17      | Male   | Neonat   | Germany | Danish Straits       | IL         |
| 24148         | Harbour porpoise | 2019-09-19      | Female | Juvenile | Germany | Danish Straits       | PMO        |
| 24149         | Harbour porpoise | 2019-09-19      | Male   | Neonat   | Germany | Danish Straits       | PMO        |
| 24150         | Harbour porpoise | 2019-09-22      | Male   | Neonat   | Germany | North Sea            | IL         |
| 24392         | Harbour porpoise | 2019-09-23      | Male   | Juvenile | Germany | Danish Straits       | PMO        |
| 24241         | Harbour porpoise | 2019-09-27      | Male   | Juvenile | Denmark | Danish Straits       | IL         |
| 24391         | Harbour porpoise | 2019-09-27      | Male   | Juvenile | Germany | Danish Straits       | PMO        |
| 24471         | Harbour porpoise | 2019-09-29      | Female | Juvenile | Germany | Danish Straits       | PMO        |
| 24152         | Harbour porpoise | 2019-10-02      | Male   | Juvenile | Germany | Danish Straits       | IL         |
| 24153         | Harbour porpoise | 2019-10-02      | Male   | Neonat   | Germany | Danish Straits       | IL         |
| 24248         | Harbour porpoise | 2019-10-02      | Male   | Juvenile | Denmark | Kattegat             | IL         |
| 24349         | Harbour porpoise | 2019-10-02      | Male   | Juvenile | Germany | Danish Straits       | PMO        |
| 24390         | Harbour porpoise | 2019-10-04      | Female | Juvenile | Germany | Danish Straits       | PMO        |
| 24470         | Harbour porpoise | 2019-10-13      | Female | Juvenile | Germany | Danish Straits       | PMO        |
| 24173         | Harbour porpoise | 2019-10-14      | Female | Adult    | Germany | Danish Straits       | PMO        |
| 24472         | Harbour porpoise | 2019-10-30      | Female | Juvenile | Germany | Danish Straits       | PMO        |
| 24475         | Harbour porpoise | 2019-11-22      | Female | Juvenile | Germany | Danish Straits       | PMO        |
| 24345         | Harbour porpoise | 2019-11-24      | Female | Adult    | Germany | Danish Straits       | PMO        |
| 24393         | Harbour porpoise | 2019-12-17      | Female | Juvenile | Germany | Danish Straits       | PMO        |
| <b>24341</b>  | Harbour porpoise | NA              | NA     | NA       | Germany | <b>German Baltic</b> | PMO        |

| Sample number | Species      | Collection date | Sex    | Age      | Country | Area           | Extraction |
|---------------|--------------|-----------------|--------|----------|---------|----------------|------------|
| A2002/05131   | Harbour seal | 2002-09-07      | Male   | 2        | Sweden  | Baltic proper  | IL         |
| A2004/02986   | Harbour seal | 2002-07-25      | Male   | 4        | Sweden  | Skagerrak      | IL         |
| A2003/05127   | Harbour seal | 2003-10-14      | Male   | ?        | Sweden  | Baltic proper  | IL         |
| 27194         | Harbour seal | 2003-05-27      | Female | 2        | Denmark | Danish straits | PL         |
| 27193         | Harbour seal | 2003-08-04      | Male   | NA       | Denmark | Danish straits | PL         |
| 34161         | Harbour seal | 2006-11-15      | Female | 1-2      | Denmark | Danish straits | PL         |
| 31610         | Harbour seal | 2006-09-22      | Female | 2-3      | Denmark | Kattegat       | PL         |
| 31611         | Harbour seal | 2006-09-22      | Male   | 0-1      | Denmark | Kattegat       | PL         |
| 37401         | Harbour seal | 2007-06-21      | Female | 0        | Denmark | Kattegat       | PL         |
| 37402         | Harbour seal | 2007-06-21      | Male   | 1-2      | Denmark | Kattegat       | PL         |
| 37403         | Harbour seal | 2007-06-21      | Male   | 1-2      | Denmark | Kattegat       | PL         |
| 37404         | Harbour seal | 2007-06-21      | Male   | > 1      | Denmark | Kattegat       | PL         |
| 37405         | Harbour seal | 2007-06-21      | Female | > 1      | Denmark | Kattegat       | PL         |
| 37406         | Harbour seal | 2007-06-21      | Female | > 1      | Denmark | Kattegat       | PL         |
| 37407         | Harbour seal | 2007-06-21      | Female | > 1      | Denmark | Kattegat       | PL         |
| 37408         | Harbour seal | 2007-06-21      | Female | > 1      | Denmark | Kattegat       | PL         |
| 37409         | Harbour seal | 2007-06-21      | Female | NA       | Denmark | Kattegat       | PL         |
| 35083         | Harbour seal | 2008-09-30      | Female | Adult    | Denmark | Danish straits | PL         |
| 35082         | Harbour seal | 2008-06-16      | Male   | 0        | Denmark | Kattegat       | PL         |
| 45408         | Harbour seal | 2010-08-12      | Male   | NA       | Denmark | Arkona Basin   | PL         |
| 45401         | Harbour seal | 2010-11-21      | Female | Adult    | Denmark | Danish straits | IL         |
| 45407         | Harbour seal | 2010-07-01      | Female | Yearling | Denmark | Kattegat       | PL         |
| 45413         | Harbour seal | 2011-05-11      | Male   | Adult    | Denmark | Danish straits | PL         |
| 45406         | Harbour seal | 2012-08-12      | Female | NA       | Denmark | Arkona Basin   | PL         |
| 45411         | Harbour seal | 2012-08-12      | Male   | Adult    | Denmark | Arkona Basin   | IL         |
| 47505         | Harbour seal | 2012-09-29      | Female | 2-3      | Denmark | Arkona Basin   | PL         |
| A2012/05940   | Harbour seal | 2012-11-13      | Male   | 8        | Sweden  | Baltic proper  | IL         |
| 45409         | Harbour seal | 2012-08-22      | Male   | Juvenile | Denmark | Danish straits | PL         |
| 45410         | Harbour seal | 2012-05-25      | Female | NA       | Denmark | The Sound      | PL         |
| 50714         | Harbour seal | 2014-11-24      | Male   | NA       | Denmark | Arkona Basin   | PL         |
| A2014/05210   | Harbour seal | 2014-04-01      | Male   | 2        | Sweden  | Baltic proper  | IL         |
| A2015/05106   | Harbour seal | 2014-09-21      | Male   | 6        | Sweden  | Baltic proper  | IL         |
| 51614         | Harbour seal | 2014-09-13      | Male   | 0        | Denmark | Kattegat       | PL, IL     |
| 50722         | Harbour seal | 2014-08-29      | Female | NA       | Denmark | Limfjorden     | PL, IL     |
| 50723         | Harbour seal | 2014-08-29      | Male   | NA       | Denmark | Limfjorden     | PL, IL     |
| 50724         | Harbour seal | 2014-08-29      | Male   | NA       | Denmark | Limfjorden     | PL, IL     |
| 50725         | Harbour seal | 2014-08-29      | Female | NA       | Denmark | Limfjorden     | PL, IL     |
| 50730         | Harbour seal | 2014-02-21      | Female | Juvenile | Denmark | North Sea      | PL         |
| 50727         | Harbour seal | 2014-04-28      | Female | Adult    | Denmark | North Sea      | PL         |



| Sample number | Species      | Collection date | Sex    | Age      | Country | Area           | Extraction |
|---------------|--------------|-----------------|--------|----------|---------|----------------|------------|
| 50716         | Harbour seal | 2014-05-07      | Female | Juvenile | Denmark | The Sound      | PL         |
| 50717         | Harbour seal | 2014-05-07      | Female | Juvenile | Denmark | The Sound      | PL         |
| 50718         | Harbour seal | 2014-05-07      | Male   | Adult    | Denmark | The Sound      | PL         |
| 50720         | Harbour seal | 2014-08-28      | Female | Juvenile | Denmark | The Sound      | PL         |
| 50721         | Harbour seal | 2014-08-28      | Female | Adult    | Denmark | The Sound      | PL         |
| A2015/05105   | Harbour seal | 2015-02-03      | Female | 3        | Sweden  | The Sound      | IL         |
| M1515         | Harbour seal | 2015-04-07      | Female | Juvenile | Denmark | The Sound      | PL         |
| M1516         | Harbour seal | 2016-01-15      | Male   | Adult    | Denmark | The Sound      | PL         |
| A2019/05494   | Harbour seal | 2018-10-11      | Male   | NA       | Sweden  | Bornholm Basin | IL         |
| 24232         | Harbour seal | 2018-08-20      | Male   | 0        | Denmark | Danish Straits | IL         |
| 24266         | Harbour seal | 2018-10-29      | Female | Adult    | Denmark | Danish Straits | IL         |
| 23514         | Harbour seal | 2018-11-01      | Male   | NA       | Germany | Danish Straits | IL         |
| A2019/05259   | Harbour seal | 2018-11-21      | Female | Adult    | Sweden  | Kattegat       | IL         |
| A2019/05257   | Harbour seal | 2018-12-25      | Male   | Adult    | Sweden  | Kattegat       | IL         |
| A2019/05134   | Harbour seal | 2018-10-01      | Female | Adult    | Sweden  | Kattegat       | IL         |
| A2019/05136   | Harbour seal | 2018-10-01      | Female | 0-1      | Sweden  | Kattegat       | IL         |
| A2019/05138   | Harbour seal | 2018-10-01      | Male   | 0-1      | Sweden  | Kattegat       | IL         |
| A2019/05131   | Harbour seal | 2018-10-04      | Female | 0-1      | Sweden  | Kattegat       | IL         |
| A2019/05132   | Harbour seal | 2018-10-04      | Male   | 0-1      | Sweden  | Kattegat       | IL         |
| A2019/05130   | Harbour seal | 2018-10-07      | Female | NA       | Sweden  | Kattegat       | IL         |
| A2019/05135   | Harbour seal | 2018-10-07      | Female | 0-1      | Sweden  | Kattegat       | IL         |
| 23398         | Harbour seal | 2018-01-13      | Female | NA       | Germany | North Sea      | IL         |
| 23697         | Harbour seal | 2018-03-05      | Male   | NA       | Germany | North Sea      | IL         |
| 23389         | Harbour seal | 2018-10-05      | Male   | NA       | Germany | North Sea      | IL         |
| A2019/05137   | Harbour seal | 2018-10-01      | NA     | NA       | Sweden  | Skagerrak      | IL         |
| A2019/05133   | Harbour seal | 2018-10-12      | Female | Adult    | Sweden  | Skagerrak      | IL         |
| 43790         | Harbour seal | 2018-10-10      | Male   | Juvenile | Denmark | The Sound      | PL         |
| 43791         | Harbour seal | 2018-10-10      | NA     | NA       | Denmark | The Sound      | PL         |
| 24260         | Harbour seal | 2019-08-11      | Female | 0        | Denmark | Danish Straits | IL         |
| 24246         | Harbour seal | 2019-08-28      | Male   | Yearling | Denmark | Danish Straits | IL         |
| 24235         | Harbour seal | 2019-09-18      | Female | 0        | Denmark | Danish Straits | IL         |
| 24254         | Harbour seal | 2019-10-09      | Male   | Yearling | Denmark | Danish Straits | IL         |
| 24259         | Harbour seal | 2019-10-22      | Female | Yearling | Denmark | Danish Straits | IL         |
| 24234         | Harbour seal | 2019-04-28      | Male   | Yearling | Denmark | Kattegat       | IL         |
| 24236         | Harbour seal | 2019-04-28      | Female | Yearling | Denmark | Kattegat       | IL         |
| 23725         | Harbour seal | 2019-03-10      | Female | NA       | Germany | North Sea      | IL         |
| 23966         | Harbour seal | 2019-07-02      | Male   | NA       | Germany | North Sea      | IL         |
| 23997         | Harbour seal | 2019-07-23      | Male   | NA       | Germany | North Sea      | IL         |

| <b>Sample number</b> | <b>Species</b> | <b>Collection date</b> | <b>Sex</b> | <b>Age</b> | <b>Country</b> | <b>Area</b> | <b>Extraction</b> |
|----------------------|----------------|------------------------|------------|------------|----------------|-------------|-------------------|
| 24238                | Harbour seal   | 2019-04-07             | Male       | Yearling   | Denmark        | The Sound   | IL                |
| 24255                | Harbour seal   | 2019-05-15             | Female     | Adult      | Denmark        | The Sound   | IL                |
| 24237                | Harbour seal   | 2019-05-24             | Male       | 0          | Denmark        | The Sound   | IL                |
| 24249                | Harbour seal   | 2019-06-03             | Male       | Yearling   | Denmark        | The Sound   | IL                |
| 24253                | Harbour seal   | 2019-06-03             | Female     | Adult      | Denmark        | The Sound   | IL                |
| 24258                | Harbour seal   | 2019-08-19             | Female     | 0          | Denmark        | The Sound   | IL                |
| 24267                | Harbour seal   | 2019-08-24             | Male       | Adult      | Denmark        | The Sound   | IL                |
| 23860                | Harbour seal   | 2018-2019              | NA         | NA         | Germany        | North Sea   | IL                |

| Sample number | Species   | Collection date | Sex    | Age      | Country | Area           | Extraction |
|---------------|-----------|-----------------|--------|----------|---------|----------------|------------|
| A2003/05034   | Grey seal | 2002-12-28      | Male   | 3        | Sweden  | Arkona Basin   | IL         |
| C2002/05362   | Grey seal | 2002-10-25      | Male   | 14       | Sweden  | Baltic proper  | IL         |
| C2002/05281   | Grey seal | 2002-05-10      | Female | 13       | Sweden  | Bothnian Bay   | IL         |
| C2002/05295   | Grey seal | 2002-11-03      | Female | 3        | Sweden  | Bothnian Bay   | IL         |
| C2002/05040   | Grey seal | 2002-04-25      | Female | 0-1      | Sweden  | Bothnian Sea   | IL         |
| C2002/05114   | Grey seal | 2002-08-20      | Female | 0-1      | Sweden  | Bothnian Sea   | IL         |
| A2002/05142   | Grey seal | 2002-10-21      | Female | 11       | Sweden  | Bothnian Sea   | IL         |
| A2002/05039   | Grey seal | 2002-04-03      | Male   | 6        | Sweden  | Skagerrak      | IL         |
| C2003/05014   | Grey seal | 2003-05-25      | Female | 5        | Sweden  | Baltic proper  | IL         |
| A2003/05143   | Grey seal | 2003-11-16      | Male   | 32       | Sweden  | Baltic proper  | IL         |
| C2003/05012   | Grey seal | 2003-04-22      | Male   | 0-1      | Sweden  | Bornholm Basin | IL         |
| C2003/05008   | Grey seal | 2003-05-04      | Male   | 3        | Sweden  | Bothnian Sea   | IL         |
| C2003/05254   | Grey seal | 2003-07-08      | Female | 3        | Sweden  | Bothnian Sea   | IL         |
| 45404         | Grey seal | 2010-06-26      | Male   | Young    | Denmark | Kattegat       | PL         |
| 35093         | Grey seal | 2010-03-03      | Male   | Adult    | Denmark | The Sound      | PL         |
| 45412         | Grey seal | 2012-08-12      | Male   | -        | Denmark | SW Baltic      | PL         |
| A2014/05339   | Grey seal | 2013-04-21      | Female | 3        | Sweden  | Baltic proper  | IL         |
| A2013/05351   | Grey seal | 2013-08-07      | Male   | 0        | Sweden  | Baltic proper  | IL         |
| A2013/05455   | Grey seal | 2013-05-11      | Female | 0        | Sweden  | Bothnian Bay   | IL         |
| A2014/05497   | Grey seal | 2013-07-25      | Female | 5        | Sweden  | Bothnian Bay   | IL         |
| A2014/05492   | Grey seal | 2013-04-27      | Male   | 17       | Sweden  | Bothnian Sea   | IL         |
| A2014/05484   | Grey seal | 2013-08-01      | Female | 6        | Sweden  | Bothnian Sea   | IL         |
| 50701         | Grey seal | 2014-01-15      | NA     | NA       | Denmark | Arkona Basin   | PL         |
| 50704         | Grey seal | 2014-11-22      | Male   | NA       | Denmark | Arkona Basin   | PL         |
| A2014/05235   | Grey seal | 2014-04-25      | Female | 19       | Sweden  | Baltic proper  | IL         |
| A2014/05472   | Grey seal | 2014-08-25      | Female | 3        | Sweden  | Baltic proper  | IL         |
| A2015/05299   | Grey seal | 2014-12-31      | Male   | 2        | Sweden  | Bornholm Basin | IL         |
| A2015/05300   | Grey seal | 2014-12-31      | Male   | 2        | Sweden  | Bornholm Basin | IL         |
| A2014/05503   | Grey seal | 2014-05-11      | Male   | 8        | Sweden  | Bothnian Bay   | IL         |
| A2017/05800   | Grey seal | 2014-08-24      | Male   | 10       | Sweden  | Bothnian Bay   | IL         |
| A2014/05514   | Grey seal | 2014-07-19      | Male   | 4        | Sweden  | Bothnian Sea   | IL         |
| A2015/05080   | Grey seal | 2014-10-24      | Male   | 2        | Sweden  | Bothnian Sea   | IL         |
| 50702         | Grey seal | 2014-05-02      | NA     | Pub      | Denmark | Danish Straits | PL         |
| 50714         | Grey seal | 2014-04-23      | Female | Adult    | Denmark | SW Baltic      | PL         |
| 50728         | Grey seal | 2014-11-22      | Male   | Adult    | Denmark | The Sound      | PL         |
| 50726         | Grey seal | 2014-03-02      | Female | Juvenile | Denmark | West coast     | PL         |
| A2015/05322   | Grey seal | 2015-04-28      | Male   | 7        | Sweden  | Baltic proper  | IL         |
| A2015/05496   | Grey seal | 2015-05-08      | Male   | 5        | Sweden  | Bornholm Basin | IL         |
| A2015/05544   | Grey seal | 2015-08-13      | Female | 8        | Sweden  | Bornholm Basin | IL         |

| Sample number | Species   | Collection date | Sex    | Age      | Country | Area           | Extraction |
|---------------|-----------|-----------------|--------|----------|---------|----------------|------------|
| A2016/05148   | Grey seal | 2015-11-03      | Male   | 12       | Sweden  | Bornholm Basin | IL         |
| A2015/05572   | Grey seal | 2015-05-08      | Male   | 18       | Sweden  | Bothnian Bay   | IL         |
| A2019/05143   | Grey seal | 2015-04-24      | Female | NA       | Sweden  | Bothnian Sea   | IL         |
| A2019/05207   | Grey seal | 2015-04-24      | NA     | NA       | Sweden  | Bothnian Sea   | IL         |
| A2019/05144   | Grey seal | 2015-04-25      | Male   | NA       | Sweden  | Bothnian Sea   | IL         |
| A2019/05145   | Grey seal | 2015-04-25      | Male   | NA       | Sweden  | Bothnian Sea   | IL         |
| A2015/05543   | Grey seal | 2015-07-15      | Female | 2        | Sweden  | Bothnian Sea   | IL         |
| A2019/05237   | Grey seal | 2016-09-19      | Female | NA       | Sweden  | Bothnian Sea   | IL         |
| 23555         | Grey seal | 2017-07-12      | Female | Yearling | Poland  | Bornholm Basin | IL         |
| A2019/05378   | Grey seal | 2018-09-02      | Female | Adult    | Sweden  | Arkona Basin   | IL         |
| A2019/05514   | Grey seal | 2018-09-02      | Male   | Adult    | Sweden  | Arkona Basin   | IL         |
| A2019/05564   | Grey seal | 2018-09-02      | Female | Adult    | Sweden  | Arkona basin   | IL         |
| 23564         | Grey seal | 2018-03-16      | Male   | Adult    | Poland  | Baltic proper  | IL         |
| 23566         | Grey seal | 2018-04-05      | Male   | Pup      | Poland  | Baltic proper  | IL         |
| 23573         | Grey seal | 2018-06-14      | Female | Yearling | Poland  | Baltic proper  | IL         |
| A2019/05139   | Grey seal | 2018-08-05      | Male   | Juvenile | Sweden  | Baltic proper  | IL         |
| A2019/05142   | Grey seal | 2018-08-05      | Male   | Adult    | Sweden  | Baltic proper  | IL         |
| A2019/05243   | Grey seal | 2018-08-05      | Male   | Juvenile | Sweden  | Baltic proper  | IL         |
| A2019/05244   | Grey seal | 2018-08-05      | Male   | Juvenile | Sweden  | Baltic proper  | IL         |
| A2019/05246   | Grey seal | 2018-08-05      | Male   | Juvenile | Sweden  | Baltic proper  | IL         |
| A2019/05248   | Grey seal | 2018-08-05      | Female | Juvenile | Sweden  | Baltic proper  | IL         |
| A2019/05563   | Grey seal | 2018-08-05      | Male   | Juvenile | Sweden  | Baltic proper  | IL         |
| A2019/05140   | Grey seal | 2018-08-06      | Male   | Adult    | Sweden  | Baltic proper  | IL         |
| A2019/05245   | Grey seal | 2018-08-07      | Male   | Juvenile | Sweden  | Baltic proper  | IL         |
| A2019/05247   | Grey seal | 2018-08-07      | Female | Juvenile | Sweden  | Baltic proper  | IL         |
| A2019/05380   | Grey seal | 2018-08-29      | Male   | NA       | Sweden  | Baltic proper  | IL         |
| A2019/05515   | Grey seal | 2018-08-31      | Male   | Juvenile | Sweden  | Baltic proper  | IL         |
| A2019/05382   | Grey seal | 2018-09-05      | Female | NA       | Sweden  | Baltic proper  | IL         |
| A2019/05567   | Grey seal | 2018-09-13      | Male   | NA       | Sweden  | Baltic proper  | IL         |
| A2019/05512   | Grey seal | 2018-09-19      | Male   | Juvenile | Sweden  | Baltic proper  | IL         |
| 23585         | Grey seal | 2018-10-25      | Male   | Yearling | Poland  | Baltic proper  | IL         |
| A2019/05229   | Grey seal | 2018-?-?        | Female | NA       | Sweden  | Baltic proper  | IL         |
| A2019/05269   | Grey seal | 2018-?-?        | Female | Juvenile | Sweden  | Baltic proper  | IL         |
| 23569         | Grey seal | 2018-05-01      | Male   | Yearling | Poland  | Bornholm Basin | IL         |
| A2019/05383   | Grey seal | 2018-08-05      | Male   | NA       | Sweden  | Bornholm Basin | IL         |
| A2019/05216   | Grey seal | 2018-08-29      | Female | Adult    | Sweden  | Bornholm Basin | IL         |
| A2019/05269   | Grey seal | 2018-?-?        | Female | Juvenile | Sweden  | Baltic proper  | IL         |
| 23569         | Grey seal | 2018-05-01      | Male   | Yearling | Poland  | Bornholm Basin | IL         |
| A2019/05383   | Grey seal | 2018-08-05      | Male   | NA       | Sweden  | Bornholm Basin | IL         |

| Sample number | Species   | Collection date | Sex    | Age      | Country | Area           | Extraction |
|---------------|-----------|-----------------|--------|----------|---------|----------------|------------|
| A2019/05216   | Grey seal | 2018-08-29      | Female | Adult    | Sweden  | Bornholm Basin | IL         |
| A2019/05511   | Grey seal | 2018-09-07      | Female | NA       | Sweden  | Bornholm Basin | IL         |
| A2019/05211   | Grey seal | 2018-08-26      | Male   | Adult    | Sweden  | Bornholm Basin | IL         |
| A2019/05242   | Grey seal | 2018-09-02      | NA     | NA       | Sweden  | Bothnian Bay   | IL         |
| A2019/05267   | Grey seal | 2018-09-02      | Female | Juvenile | Sweden  | Bothnian Bay   | IL         |
| A2019/05146   | Grey seal | 2018-08-02      | Female | Juvenile | Sweden  | Bothnian Sea   | IL         |
| A2019/05226   | Grey seal | 2018-08-02      | Male   | Juvenile | Sweden  | Bothnian Sea   | IL         |
| A2019/05266   | Grey seal | 2018-08-02      | NA     | NA       | Sweden  | Bothnian Sea   | IL         |
| A2019/05275   | Grey seal | 2018-08-03      | Male   | Subadult | Sweden  | Bothnian Sea   | IL         |
| A2019/05516   | Grey seal | 2018-08-03      | Female | Adult    | Sweden  | Bothnian Sea   | IL         |
| A2019/05215   | Grey seal | 2018-08-04      | Female | Adult    | Sweden  | Bothnian Sea   | IL         |
| A2019/05230   | Grey seal | 2018-08-04      | Female | Adult    | Sweden  | Bothnian Sea   | IL         |
| A2019/05223   | Grey seal | 2018-08-10      | Male   | NA       | Sweden  | Bothnian Sea   | IL         |
| A2019/05141   | Grey seal | 2018-08-14      | Male   | Adult    | Sweden  | Bothnian Sea   | IL         |
| A2019/05213   | Grey seal | 2018-08-14      | Female | Adult    | Sweden  | Bothnian Sea   | IL         |
| A2019/05214   | Grey seal | 2018-08-14      | Female | Adult    | Sweden  | Bothnian Sea   | IL         |
| A2019/05222   | Grey seal | 2018-08-15      | Male   | Adult    | Sweden  | Bothnian Sea   | IL         |
| A2019/05231   | Grey seal | 2018-08-15      | Female | Juvenile | Sweden  | Bothnian Sea   | IL         |
| A2019/05238   | Grey seal | 2018-08-15      | Male   | NA       | Sweden  | Bothnian Sea   | IL         |
| A2019/05268   | Grey seal | 2018-08-15      | Female | Juvenile | Sweden  | Bothnian Sea   | IL         |
| A2019/05224   | Grey seal | 2018-08-20      | Male   | Adult    | Sweden  | Bothnian Sea   | IL         |
| A2019/05227   | Grey seal | 2018-08-20      | Female | Adult    | Sweden  | Bothnian Sea   | IL         |
| A2019/05208   | Grey seal | 2018-08-22      | Female | Adult    | Sweden  | Bothnian Sea   | IL         |
| A2019/05225   | Grey seal | 2018-08-22      | Male   | Adult    | Sweden  | Bothnian Sea   | IL         |
| A2019/05270   | Grey seal | 2018-08-22      | Female | Juvenile | Sweden  | Bothnian Sea   | IL         |
| A2019/05274   | Grey seal | 2018-08-22      | Female | Adult    | Sweden  | Bothnian Sea   | IL         |
| A2019/05209   | Grey seal | 2018-08-24      | Female | Adult    | Sweden  | Bothnian Sea   | IL         |
| A2019/05228   | Grey seal | 2018-08-25      | Female | Adult    | Sweden  | Bothnian Sea   | IL         |
| A2019/05273   | Grey seal | 2018-08-25      | Female | Adult    | Sweden  | Bothnian Sea   | IL         |
| A2019/05147   | Grey seal | 2018-09-02      | Male   | Adult    | Sweden  | Bothnian Sea   | IL         |
| A2019/05241   | Grey seal | 2018-09-02      | Female | Juvenile | Sweden  | Bothnian Sea   | IL         |
| A2019/05513   | Grey seal | 2018-09-02      | Female | Juvenile | Sweden  | Bothnian Sea   | IL         |
| A2019/05271   | Grey seal | 2018-09-04      | Female | Adult    | Sweden  | Bothnian Sea   | IL         |
| A2019/05272   | Grey seal | 2018-09-04      | Female | Adult    | Sweden  | Bothnian Sea   | IL         |
| A2019/05375   | Grey seal | 2018-09-04      | Female | Adult    | Sweden  | Bothnian Sea   | IL         |
| A2019/05376   | Grey seal | 2018-09-04      | Female | Adult    | Sweden  | Bothnian Sea   | IL         |
| A2019/05562   | Grey seal | 2018-09-07      | Female | NA       | Sweden  | Bothnian Sea   | IL         |
| A2019/05210   | Grey seal | 2018-09-13      | Male   | Adult    | Sweden  | Bothnian Sea   | IL         |
| A2019/05239   | Grey seal | 2018-10-01      | Female | Juvenile | Sweden  | Bothnian Sea   | IL         |

| Sample number | Species   | Collection date | Sex    | Age   | Country | Area          | Extraction |
|---------------|-----------|-----------------|--------|-------|---------|---------------|------------|
| A2019/05212   | Grey seal | 2018-10-20      | Male   | NA    | Sweden  | Bothnian Sea  | IL         |
| 23287         | Grey seal | 2018-07-31      | Female | Adult | Germany | North Sea     | IL         |
| 24265         | Grey seal | 2019-02-05      | Female | NA    | Denmark | Arkona Basin  | IL         |
| 24264         | Grey seal | 2019-10-01      | Male   | Adult | Denmark | Arkona Basin  | IL         |
| A2019/05569   | Grey seal | 2019-08-03      | Male   | NA    | Sweden  | Baltic proper | IL         |
| A2019/05381   | Grey seal | 2019-08-15      | Male   | NA    | Sweden  | Baltic proper | IL         |
| A2019/05566   | Grey seal | 2019-09-04      | Male   | NA    | Sweden  | Baltic proper | IL         |
| A2019/05627   | Grey seal | 2019-09-16      | Female | NA    | Sweden  | Baltic proper | IL         |
| A2019/05148   | Grey seal | 2019-10-15      | Male   | NA    | Sweden  | Baltic proper | IL         |
| A2019/05570   | Grey seal | 2019-08-10      | Fenale | NA    | Sweden  | Bothnian Sea  | IL         |
| 23733         | Grey seal | 2019-03-23      | NA     | NA    | Germany | North Sea     | IL         |
| 24145         | Grey seal | 2019-04-14      | Male   | NA    | Poland  | NA            | IL         |

| Sample number | Species     | Collection date | Sex    | Age   | Country | Area           | Extraction |
|---------------|-------------|-----------------|--------|-------|---------|----------------|------------|
| A2002/05049   | Ringed seal | 2002-04-29      | Female | 2     | Sweden  | Baltic proper  | PL         |
| A2002/05132   | Ringed seal | 2002-09-30      | Female | 0-1   | Sweden  | Baltic proper  | PL         |
| A2002/05129   | Ringed seal | 2002-09-22      | Male   | 0-1   | Sweden  | Bothnian Sea   | PL         |
| A2002/05130   | Ringed seal | 2002-09-24      | Male   | NA    | Sweden  | Bothnian Sea   | PL         |
| A2003/05071   | Ringed seal | 2003-06-26      | Female | NA    | Sweden  | Bothnian Bay   | PL         |
| A2003/05072   | Ringed seal | 2003-05-05      | Male   | 0-1   | Sweden  | Bothnian Sea   | PL         |
| A2003/05089   | Ringed seal | 2003-08-22      | Female | NA    | Sweden  | Bothnian Sea   | PL         |
| A2003/05134   | Ringed seal | 2003-10-13      | Male   | NA    | Sweden  | Bothnian Sea   | PL         |
| A2006/05406   | Ringed seal | 2006-10-25      | Male   | 0-1   | Sweden  | Baltic proper  | PL         |
| A2006/05390   | Ringed seal | 2006-10-11      | Female | 0-1   | Sweden  | Bornholm Basin | PL         |
| A2006/05441   | Ringed seal | 2006-12-13      | Male   | NA    | Sweden  | Bothnian Sea   | PL         |
| A2007/05299   | Ringed seal | 2007-09-19      | Female | Adult | Sweden  | Bothnian Bay   | PL         |
| A2008/05113   | Ringed seal | 2007-05-11      | Male   | 0-1   | Sweden  | Bothnian Sea   | PL         |
| A2007/05223   | Ringed seal | 2007-06-26      | Male   | NA    | Sweden  | Bothnian Sea   | PL         |
| A2007/05320   | Ringed seal | 2007-10-02      | Male   | NA    | Sweden  | Bothnian Sea   | PL         |
| A2007/05395   | Ringed seal | 2007-11-05      | Female | 1     | Sweden  | Bothnian Sea   | PL         |
| A2008/05299   | Ringed seal | 2008-05-23      | Male   | 12    | Sweden  | Bothnian Bay   | PL         |
| A2008/05330   | Ringed seal | 2008-05-28      | Female | 13    | Sweden  | Bothnian Bay   | PL         |
| A2008/05347   | Ringed seal | 2008-05-29      | Female | 7     | Sweden  | Bothnian Bay   | PL         |
| A2009/05052   | Ringed seal | 2008-06-16      | Male   | 3     | Sweden  | Bothnian Bay   | PL         |
| A2008/05197   | Ringed seal | 2008-04-06      | Male   | 0-1   | Sweden  | Bothnian Sea   | PL         |
| A2008/05394   | Ringed seal | 2008-05-20      | Female | 0-1   | Sweden  | Bothnian Sea   | PL         |
| A2008/05429   | Ringed seal | 2008-08-02      | Female | 0-1   | Sweden  | Bothnian Sea   | PL         |
| A2014/05193   | Ringed seal | 2013-04-22      | Male   | 11    | Sweden  | Baltic proper  | PL         |
| A2013/05447   | Ringed Seal | 2013-08-27      | Female | 0-1   | Sweden  | Bothnian Bay   | PL         |
| A2018/05190   | Ringed seal | 2013-11-01      | Female | 3     | Sweden  | Bothnian Bay   | PL         |
| A2014/05703   | Ringed seal | 2013-11-02      | Male   | 12    | Sweden  | Bothnian Bay   | PL         |
| A2013/05342   | Ringed seal | 2013-08-02      | Male   | 14    | Sweden  | Bothnian Sea   | PL         |
| A2014/05144   | Ringed seal | 2013-11-19      | Male   | 3     | Sweden  | Bothnian Sea   | PL         |
| A2015/05316   | Ringed seal | 2014-09-28      | Male   | 0-1   | Sweden  | Baltic proper  | PL         |
| A2015/05292   | Ringed seal | 2014-06-20      | Male   | 0-1   | Sweden  | Bothnian Bay   | PL         |
| A2015/05320   | Ringed seal | 2014-10-17      | Male   | 1     | Sweden  | Bothnian Bay   | PL         |
| A2014/05650   | Ringed seal | 2014-11-03      | Female | 23    | Sweden  | Bothnian Bay   | PL         |
| A2015/05079   | Ringed seal | 2014-04-02      | Male   | 0-1   | Sweden  | Bothnian Sea   | PL         |
| A2015/05317   | Ringed seal | 2014-05-26      | Male   | 0-1   | Sweden  | Bothnian Sea   | PL         |
| A2015/05224   | Ringed seal | 2014-06-28      | Female | 0-1   | Sweden  | Bothnian Sea   | PL         |
| A2016/05133   | Ringed seal | 2015-10-09      | Female | 0-1   | Sweden  | Baltic proper  | PL         |
| A2015/05733   | Ringed seal | 2015-05-30      | Male   | 29    | Sweden  | Bothnian Bay   | PL         |

| Sample number | Species     | Collection date | Sex    | Age | Country | Area           | Extraction |
|---------------|-------------|-----------------|--------|-----|---------|----------------|------------|
| A2015/05559   | Ringed seal | 2015-06-22      | Female | 1   | Sweden  | Bothnian Bay   | PL         |
| A2018/05118   | Ringed seal | 2015-11-19      | Female | 10  | Sweden  | Bothnian Bay   | PL         |
| A2018/05095   | Ringed seal | 2015-12-13      | Male   | 5   | Sweden  | Bothnian Bay   | PL         |
| A2015/05492   | Ringed seal | 2015-04-15      | Female | 3   | Sweden  | Bothnian Sea   | PL         |
| A2017/05370   | Ringed seal | 2015-05-27      | Female | 0-1 | Sweden  | Bothnian Sea   | PL         |
| A2017/05816   | Ringed seal | 2017-05-06      | Male   | 18  | Sweden  | Bothnian Bay   | PL         |
| A2018/05280   | Ringed seal | 2017-08-01      | Female | 9   | Sweden  | Bothnian Bay   | PL         |
| A2018/05297   | Ringed seal | 2017-08-21      | Male   | 8   | Sweden  | Bothnian Bay   | PL         |
| A2018/05485   | Ringed seal | 2017-09-24      | Male   | 5   | Sweden  | Bothnian Bay   | PL         |
| A2018/05153   | Ringed seal | 2017-10-01      | Male   | 26  | Sweden  | Bothnian Bay   | PL         |
| A2018/05290   | Ringed seal | 2017-10-05      | Female | 17  | Sweden  | Bothnian Bay   | PL         |
| A2018/05489   | Ringed seal | 2017-10-22      | Female | 11  | Sweden  | Bothnian Bay   | PL         |
| A2018/05281   | Ringed seal | 2017-10-29      | Female | 11  | Sweden  | Bothnian Bay   | PL         |
| A2018/05579   | Ringed seal | 2017-11-05      | Female | 0-1 | Sweden  | Bothnian Bay   | PL         |
| A2018/05144   | Ringed seal | 2017-06-03      | Male   | 0-1 | Sweden  | Bothnian Sea   | PL         |
| A2018/05086   | Ringed seal | 2017-10-20      | Female | 0-1 | Sweden  | Bothnian Sea   | IL         |
| A2018/05151   | Ringed seal | 2017-12-18      | Male   | 0-1 | Sweden  | Bothnian Sea   | PL         |
| A2018/05298   | Ringed seal | 2018-03-15      | Male   | 23  | Sweden  | Baltic proper  | PL         |
| 23204         | Ringed seal | 2018-06-12      | Female | NA  | Sweden  | Bothnian Bay   | PL         |
| 23205         | Ringed seal | 2018-06-13      | Male   | NA  | Sweden  | Bothnian Bay   | PL         |
| 23206         | Ringed seal | 2018-06-14      | Male   | NA  | Sweden  | Bothnian Bay   | PL         |
| 23207         | Ringed seal | 2018-06-14      | Female | NA  | Sweden  | Bothnian Bay   | PL         |
| 23208         | Ringed seal | 2018-06-14      | Female | NA  | Sweden  | Bothnian Bay   | PL         |
| A2018/05694   | Ringed seal | 2018-10-18      | Male   | NA  | Sweden  | Bothnian Bay   | IL         |
| 23319         | Ringed seal | 2018-09-02      | Male   | NA  | Sweden  | Danish straits | IL         |



**Supplementary Table S2.** Information on sequences included in the PhoPeV phylogeny.

| Sample ID | Species | Host             | Find date | Location    | Sequence name (genome) | Tissue | Sequence name (genome) | Tissue | Sequence ID (P) | Tissue | Sequence ID (E2) | Tissue |
|-----------|---------|------------------|-----------|-------------|------------------------|--------|------------------------|--------|-----------------|--------|------------------|--------|
| 43720     | PhoPeV  | Harbour porpoise | 20110204  | Denmark     | New sequence           | Lung   |                        |        |                 |        |                  |        |
| NS170385  | PhoPeV  | Harbour porpoise | 201205    | Netherlands | MK910227               | Lung   |                        |        |                 |        |                  |        |
| NS170386  | PhoPeV  | Harbour porpoise | 200812    | Netherlands | MK910229               | Lung   | MK910228               | Brain  |                 |        |                  |        |
| NS190100  | PhoPeV  | Harbour porpoise | 201409    | Netherlands |                        |        |                        |        | MK910230        | Kidney | MK910234         | Kidney |
| NS190109  | PhoPeV  | Harbour porpoise | 200507    | Netherlands |                        |        |                        |        | MK910231        | Kidney | MK910235         | Kidney |
| NS190022  | PhoPeV  | Harbour porpoise | 200106    | Netherlands |                        |        |                        |        | MK910232        | Kidney | MK910236         | Kidney |
| NS190017  | PhoPeV  | Harbour porpoise | 200404    | Netherlands |                        |        |                        |        | MK910233        | Kidney | MK910237         | Kidney |

**Supplementary Table S3.** Information on sequences used in the PhoPeV, BuPV and LindaV analyses.

| Sample ID    | Genbank      | Coverage | Virus  | Host             | Find date  | Location    |
|--------------|--------------|----------|--------|------------------|------------|-------------|
| 43720        | New sequence | Genome   | PhoPeV | Harbour porpoise | 2011-02-04 | Denmark     |
| NS170385     | MK910227     | Genome   | PhoPeV | Harbour porpoise | 2012-05-?  | Netherlands |
| NS170386     | MK910229/28  | Genome   | PhoPeV | Harbour porpoise | 2008-12-?  | Netherlands |
| NS190100     | MK910234     | E2       | PhoPeV | Harbour porpoise | 2014-09-?  | Netherlands |
| NS190109     | MK910235     | E2       | PhoPeV | Harbour porpoise | 2005-07-?  | Netherlands |
| NS190022     | MK910236     | E2       | PhoPeV | Harbour porpoise | 2001-06-?  | Netherlands |
| NS190017     | MK910237     | E2       | PhoPeV | Harbour porpoise | 2004-04-?  | Netherlands |
| 03/2007-9    | MH807261     | Genome   | BuPV   | Pig              | 2003-08-06 | Australia   |
| E570/E2/2010 | MH807262     | Genome   | BuPV   | Pig              | 2012-09-29 | Australia   |
| H482/E2/2014 | MH807263     | Genome   | BuPV   | Pig              | 2014-01-09 | Australia   |
| C843/E2/2003 | MH712512     | E2       | BuPV   | Pig              | 2003-07-21 | Australia   |
| E570/E2/2010 | MH712513     | E2       | BuPV   | Pig              | 2010-09-29 | Australia   |
| E997/E2/2011 | MH712514     | E2       | BuPV   | Pig              | 2011-08-29 | Australia   |
| 03/2007-5    | MH712515     | E2       | BuPV   | Pig              | 2003-08-06 | Australia   |
| 03/2007-9    | MH712516     | E2       | BuPV   | Pig              | 2003-08-06 | Australia   |
| E889/E2/2011 | MH712517     | E2       | BuPV   | Pig              | 2011-06-08 | Australia   |
| H153/E2/2013 | MH712518     | E2       | BuPV   | Pig              | 2013-07-24 | Australia   |
| H151/E2/2013 | MH712519     | E2       | BuPV   | Pig              | 2013-07-24 | Australia   |
| H482/E2/2014 | MH712520     | E2       | BuPV   | Pig              | 2014-01-09 | Australia   |
| H624/E2/2014 | MH712521     | E2       | BuPV   | Pig              | 2014-03-05 | Australia   |
| NrPV/NYC-D23 | KY436034     | Genome   | LindaV | Pig              | 2015-01?-? | Austria     |
| Austria2     | MZ027894     | Genome   | LindaV | Pig              | 2016-?-?   | Austria     |

**Supplementary Table S4.** Overview of initial alignments tested for recombination and substitution saturation including coverage, number of sequences and sequence length. CR = conserved regions. The conserved regions 1, 2, 3 and 4 correspond to the amino acid positions 189–418, 1547–2321, 2397–2688 and 3312–3837 numbered according to the reference sequence for BVDV-1 SD-1 (accession number M96751) (Smith *et al.*, 2017). The concatenated regions\* covers the 5'UTR, C, Erns, E1 and E2 regions.

| Alignment               | Data        | Coverage              | Sequences (n) | Length (bp) | Recombination | Saturation |
|-------------------------|-------------|-----------------------|---------------|-------------|---------------|------------|
| PhoPeV alignment        | Nucleotides | Concatenated regions* | 8             | 2,502       | No → in       | No         |
| PhoPeV alignment        | Nucleotides | E2                    | 8             | 1,137       | No → in       | No         |
| PhoPeV, BuPV and LindaV | Nucleotides | E2                    | 19            | 1,065       | No → in       | Yes        |
| PhoPeV, BuPV and LindaV | Nucleotides | CR 1                  | 7             | 687         | Yes → out     | Yes        |
| PhoPeV, BuPV and LindaV | Nucleotides | CR 2                  | 8             | 2,325       | No → in       | Yes        |
| PhoPeV, BuPV and LindaV | Nucleotides | CR 3                  | 8             | 876         | No → in       | Yes        |
| PhoPeV, BuPV and LindaV | Nucleotides | CR 4                  | 8             | 1,575       | Yes → out     | Yes        |
| PhoPeV, BuPV and LindaV | Nucleotides | CR 2 and 3            | 10            | 3,201       | No → in       | Yes        |
| PhoPeV, BuPV and LindaV | Nucleotides | Concatenated regions* | 9             | 2,004       | No → in       | Yes        |
| PhoPeV, BuPV and LindaV | Amino acids | Genome                | 8             | 3,748       |               |            |
| PhoPeV, BuPV and LindaV | Amino acids | Concatenated          | 12            | 710         |               |            |
| PhoPeV, BuPV and LindaV | Amino acids | E2                    | 16            | 374         |               |            |
| All known pestiviruses  | Amino acids | CR 1, 2, 3 and 4      | 112           | 1,781       |               |            |

**Supplementary Table S5.** Results from the Modeltest-NG indicating the best fit substitution model for the data sets based on AIC and BIC. CR = conserved region.

| Alignment               | Data        | Coverage              | Sequences (n) | Modeltest-ng |
|-------------------------|-------------|-----------------------|---------------|--------------|
| PhoPeV alignment        | Nucleotides | Concatenated regions* | 8             | TrN → TN93   |
| PhoPeV alignment        | Nucleotides | E2                    | 8             | TrN → TN93   |
| PhoPeV, BuPV and LindaV | Nucleotides | CR 2                  | 8             | TIM2         |
| PhoPeV, BuPV and LindaV | Nucleotides | CR 3                  | 8             | GTR          |
| PhoPeV, BuPV and LindaV | Nucleotides | CR 2 and 3            | 10            | TIM2         |
| PhoPeV, BuPV and LindaV | Amino acids | Genome                | 8             | WAG          |
| PhoPeV, BuPV and LindaV | Amino acids | Concatenated regions* | 12            | JTT          |
| PhoPeV, BuPV and LindaV | Amino acids | E2                    | 16            | JTT          |
| All known pestiviruses  | Amino acids | CR 1, 2, 3, 4         | 112           | JTT          |

**Supplementary Table S6.** Results of initial BEAST tests of nucleotide and amino acid alignments of PhoPeV, BuPV and LindaV sequences run with a strict clock and 20,000,000 MCMC. Runs assigned with \* provided ESS values > 100. Indicating that some priors did not converge under these conditions. The rest of the runs had ESS values > 200.

| Alignment           | Data        | Clock  | Tree model              | Tree height      | Posterior | Likelihood | Prior |
|---------------------|-------------|--------|-------------------------|------------------|-----------|------------|-------|
| E2                  | Nucleotide  | Strict | Bayesian skyline        | 349 [205, 509]   | 1593      | 2725       | 1080  |
| E2                  | Nucleotide  | Strict | Constant coalescence    | 199 [142, 266]   | 2980      | 3113       | 1868  |
| E2                  | Nucleotide  | Strict | Exponential coalescence | 235 [155, 325]   | 2412      | 2533       | 1546  |
| E2                  | Amino acids | Strict | Bayesian skyline        | 250 [115, 433]   | 418       | 3422       | 318   |
| E2                  | Amino acids | Strict | Constant coalescence    | 135 [96, 181]    | 3438      | 4576       | 2209  |
| E2                  | Amino acids | Strict | Exponential coalescence | 153 [105, 206]   | 2733      | 3787       | 1802  |
| Concatenated        | Amino acids | Strict | Bayesian skyline        | 358 [158, 634]   | 1632      | 4242       | 1524  |
| Concatenated        | Amino acids | Strict | Constant coalescence    | 171 [119, 226]   | 5579      | 4644       | 4089  |
| Concatenated        | Amino acids | Strict | Exponential coalescence | 192 [134, 264]   | 5649      | 4419       | 3946  |
| Conserved region 2* | Nucleotide  | Strict | Bayesian skyline        | 463 [174, 862]   | 854       | 843        | 780   |
| Conserved region 2  | Nucleotide  | Strict | Constant coalescence    | 194 [139, 259]   | 1668      | 1313       | 1739  |
| Conserved region 2  | Nucleotide  | Strict | Exponential coalescence | 244 [159, 337]   | 1683      | 1134       | 1825  |
| Conserved region 3* | Nucleotide  | Strict | Bayesian skyline        | 1622 [107, 4073] | 392       | 1165       | 391   |
| Conserved region 3  | Nucleotide  | Strict | Constant coalescence    | 134 [85, 191]    | 3463      | 2126       | 2406  |
| Conserved region 3  | Nucleotide  | Strict | Exponential coalescence | 186 [105, 291]   | 3244      | 1652       | 1557  |
| Genome              | Amino acids | Strict | Bayesian skyline        | 1919 [266, 3860] | 552       | 3126       | 531   |
| Genome              | Amino acids | Strict | Constant coalescence    | 262 [186, 343]   | 4300      | 2519       | 2413  |
| Genome              | Amino acids | Strict | Exponential coalescence | 326 [209, 453]   | 4959      | 3107       | 2603  |

**Supplementary Table S7.** Results of path sampling analyses of the PhoPeV alignment evaluating the best fit model for the data by the calculation of likelihood scores. The analyses were performed under different combinations of clock models (strict clock, relaxed clock lognormal and relaxed clock exponential) and tree prior specifying population dynamics (coalescence constant, coalescence exponential growth, coalescence Bayesian skyline and birth death models). Path sampling analyses were conducted with a chain length of 1,600,000 generations, alpha of 0.3, burn-in percentage of 10, a pre-burn-in of 10 and number of steps set to 112. Tree height estimates correspond to the time to the most recent common ancestor (tMRCA) shared between sequences included in the analysis and were obtained through BEAST v2.6.3 analyses with settings as described in the table and chain length of 200,000,000 Markov Chain Monte Carlo (MCMC). The model with the highest support is marked in bold in the marginal likelihood column.

| Number | Clock       | Tree Model              | Substitution model | TreeHeight    | Marginal likelihood |
|--------|-------------|-------------------------|--------------------|---------------|---------------------|
| 1      | Strict      | Bayesian skyline        | TN93               | 102 [43, 184] | -4907,43            |
| 2      | Strict      | Constant coalescence    | TN93               | 53 [32, 115]  | -4906,68            |
| 3      | Strict      | Exponential coalescence | TN93               | 54 [39, 71]   | -4908,30            |
| 4      | Lognormal   | Bayesian skyline        | TN93               | 26 [13, 68]   | -4905,48            |
| 5      | Lognormal   | Constant coalescence    | TN93               | 21 [13, 44]   | -4903,56            |
| 6      | Lognormal   | Exponential coalescence | TN93               | 20 [13, 44]   | -4905,39            |
| 7      | Exponential | Bayesian skyline        | TN93               | 18 [13, 29]   | -4905,07            |
| 8      | Exponential | Constant coalescence    | TN93               | 19 [13, 28]   | <b>-4902,58</b>     |
| 9      | Exponential | Exponential coalescence | TN93               | 18 [13, 29]   | -4904,86            |
| 13     | Strict      | BirthDeath              | TN93               | 134 [48, 277] | -4907,59            |

**Supplementary Table S8.** Results of path sampling analyses of the PhoPeV, BuPeV and LindaV alignment evaluating the best fit model for the data by the calculation of a marginal likelihood (ML) score. The analyses were performed under different combinations of clock models (strict clock, relaxed clock lognormal and relaxed clock exponential) and tree prior specifying population dynamics (coalescence constant (CC), coalescence exponential (EC) growth, coalescence Bayesian skyline (BS) and birth death (BD) model). Path sampling analyses were conducted with a chain length of 1,600,000 M generations, alpha of 0.3, burn-in percentage of 10, a pre-burn-in of 10 and number of steps set to 112. Tree height estimates correspond to the time to the most recent common ancestor (tMRCA) shared between sequences included in the analysis and were obtained through BEAST v2.6.3 analyses with settings as described in the table generated with a chain length of 200,000,000 Markov chain Monte Carlo (MCMC). The model with the highest support is marked with black in the marginal likelihood (ML) column.

| Number | Clock       | Tree Model | TreeHeight        | PhoPeV               | BuPeV                | Linda                | ML              |
|--------|-------------|------------|-------------------|----------------------|----------------------|----------------------|-----------------|
| 1      | Strict      | BS         | 201<br>[104, 326] | 2006<br>[2002, 2009] | 2002<br>[2000, 2004] | 2012<br>[2009, 2015] | -5152,59        |
| 2      | Strict      | CC         | 120<br>[80, 165]  | 2007<br>[2006, 2009] | 2003<br>[2002, 2004] | 2014<br>[2012, 2015] | -5160,04        |
| 3      | Strict      | EC         | 142<br>[87, 203]  | 2007<br>[2005, 2009] | 2003<br>[2002, 2004] | 2013<br>[2011, 2015] | -5154,91        |
| 4      | Lognormal   | BS         | 61<br>[13, 174]   | 2005<br>[1998, 2009] | 1997<br>[1984, 2004] | 2011<br>[2002, 2015] | -5137,01        |
| 5      | Lognormal   | CC         | 24<br>[13, 42]    | 2008<br>[2007, 2009] | 2002<br>[1998, 2004] | 2013<br>[2010, 2015] | -5133,50        |
| 6      | Lognormal   | EC         | 26<br>[13, 52]    | 2008<br>[2007, 2009] | 2002<br>[1998, 2004] | 2014<br>[2010, 2015] | <b>-5133,43</b> |
| 7      | Exponential | BS         | 48<br>[14, 111]   | 2008<br>[2007, 2009] | 2002<br>[1997, 2004] | 2014<br>[2010, 2015] | -5139,56        |
| 8      | Exponential | CC         | 26<br>[14, 44]    | 2009<br>[2008, 2009] | 2003<br>[2001, 2004] | 2014<br>[2012, 2015] | -5136,64        |
| 9      | Exponential | EC         | 31<br>[14, 56]    | 2009<br>[2008, 2009] | 2003<br>[2000, 2004] | 2014<br>[2012, 2015] | -5136,25        |
| 10     | Strict      | BD         | 220<br>[105, 367] | 2005<br>[2000, 2008] | 2002<br>[2000, 2004] | 2012<br>[2008, 2015] | -5157,35        |
| 11     | Lognormal   | BD         | 102<br>[14, 287]  | 1990<br>[1944, 2009] | 1982<br>[1927, 2004] | 1997<br>[1952, 2015] | NA              |
| 12     | Exponential | BD         | 52                | 2007                 | 2001                 | 2012                 | -5143,12        |

|           |              |              |              |
|-----------|--------------|--------------|--------------|
| [17, 205] | [2003, 2009] | [1993, 2004] | [2005, 2015] |
|-----------|--------------|--------------|--------------|
